# Supplementary material for: MLKL forms cation channels
Source: PubMed Central journal article supplement — Cell Res. 2016 Apr 1;26(5):517–28. doi: 10.1038/cr.2016.26 (PMC4856759; doi:10.1038/cr.2016.26), 2016-04-01
Supplement: cr201626x1.pdf [file cr201626x1.pdf]

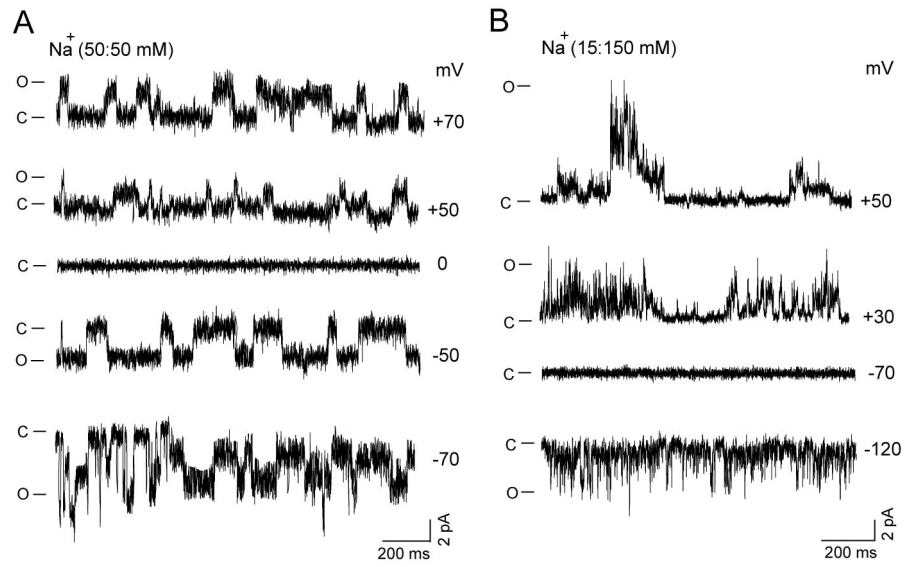

**Figure S1.** Representative traces of MLKL<sup>E/D</sup> channels in 50 mM symmetric Na<sup>+</sup> solutions (A) and asymmetric 15:150 mM (*cis:trans*) Na<sup>+</sup> solutions (B) under indicated membrane potentials.
