# Supplementary material for: MLKL forms cation channels
Source: PubMed Central journal article supplement — Cell Res. 2016 Apr 1;26(5):517–28. doi: 10.1038/cr.2016.26 (PMC4856759; doi:10.1038/cr.2016.26), 2016-04-01
Supplement: cr201626x2.pdf [file cr201626x2.pdf]

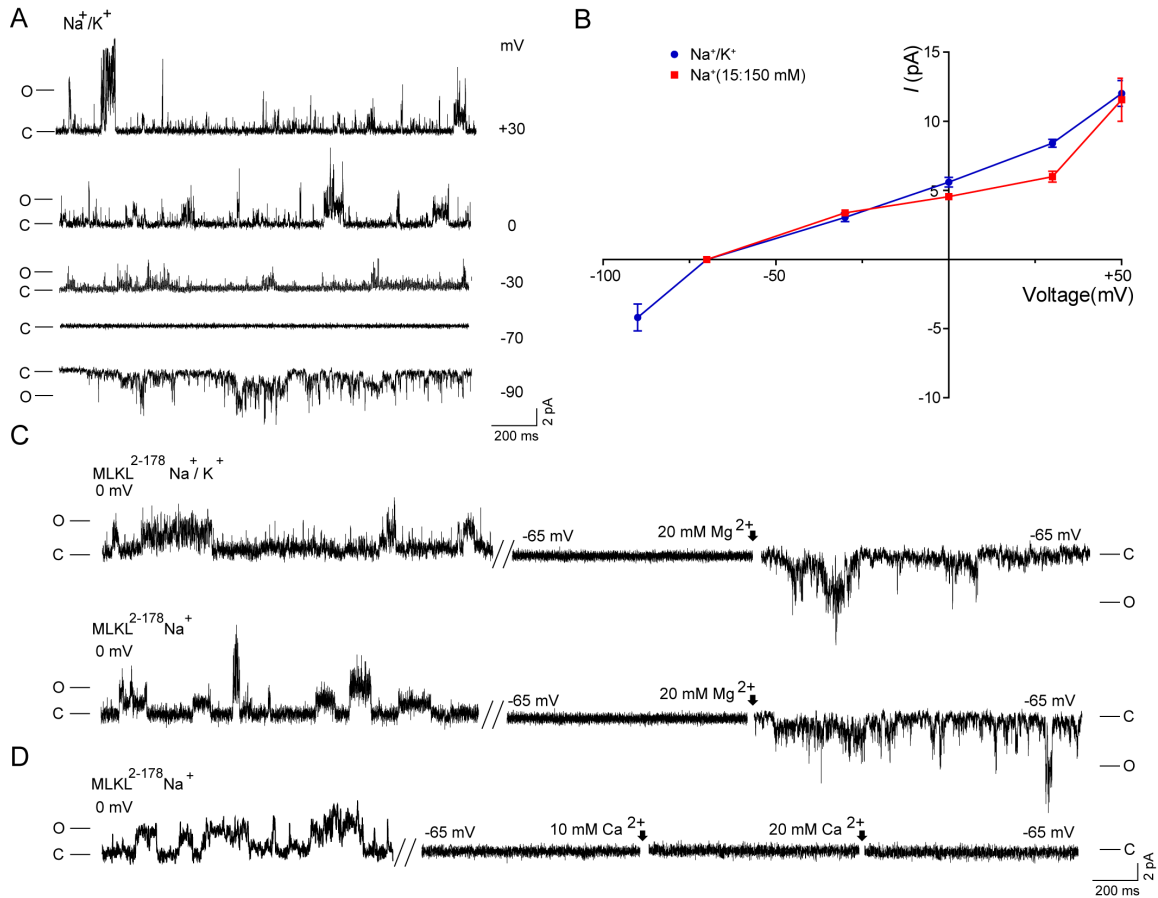

**Figure S2. MLKL N-terminal domain (MLKL<sup>2-178</sup>) functions similar with full length MLKL<sup>E/D</sup>.** (A)

Representative traces of MLKL<sup>2-178</sup> in Na<sup>+</sup>/K<sup>+</sup> mixture solutions under indicated membrane potentials. For the Na<sup>+</sup>/K<sup>+</sup> mixture solutions, the *cis* side solutions contain 10 mM Na<sup>+</sup> and 5 mM K<sup>+</sup>. The *trans* side solutions contain 120 mM Na<sup>+</sup> and 30 mM K<sup>+</sup>. (B) Current-voltage plots of MLKL<sup>2-178</sup> channels in the indicated solutions. The asymmetric Na<sup>+</sup> solutions contain 15:150 mM (*cis:trans*) Na<sup>+</sup>. The reversal potentials in the two types of solutions are approximate -65 mV, indicating a cation selectivity of MLKL<sup>2-178</sup> channels. (C) A similar strategy shown in Figure 3 was performed to investigate

Mg<sup>2+</sup> permeability of MLKL<sup>2-178</sup>. MLKL<sup>2-178</sup> mediates typical step-like currents in the presence asymmetric Na<sup>+</sup> or Na<sup>+</sup>/K<sup>+</sup> solutions. The frequent and continuous outward currents indicate that the MLKL<sup>2-178</sup> channels were incorporated into the membranes. The membrane potential was then changed to the corresponding equilibrium potential, -65 mV, to eliminate the currents. Inward step-like signals appeared when 20 mM (final concentration) Mg<sup>2+</sup> was added to the *cis* side, indicating presence of Mg<sup>2+</sup> currents (n > 4). (D) MLKL2-178 cannot induce currents in Na<sup>+</sup>/Ca<sup>2+</sup> mixture solutions. (E) A similar strategy shown in Figure 3 was performed to investigate Ca<sup>2+</sup> permeability of MLKL<sup>2-178</sup>. Representative step-like currents in the asymmetric 15:150 mM (*cis:trans*) Na<sup>+</sup> solutions indicate the formation of MLKL<sup>2-178</sup> channels in the lipid membranes. Next, the holding potential was changed to -65 mV, the Na<sup>+</sup> equilibrium potential, to eliminate the Na<sup>+</sup> signals. Additional supplementation of 10 mM and 20 mM (final concentration) Ca<sup>2+</sup> was added to the *cis* side sequentially.
