# Supplementary material for: MLKL forms cation channels
Source: PubMed Central journal article supplement — Cell Res. 2016 Apr 1;26(5):517–28. doi: 10.1038/cr.2016.26 (PMC4856759; doi:10.1038/cr.2016.26), 2016-04-01
Supplement: cr201626x3.pdf [file cr201626x3.pdf]

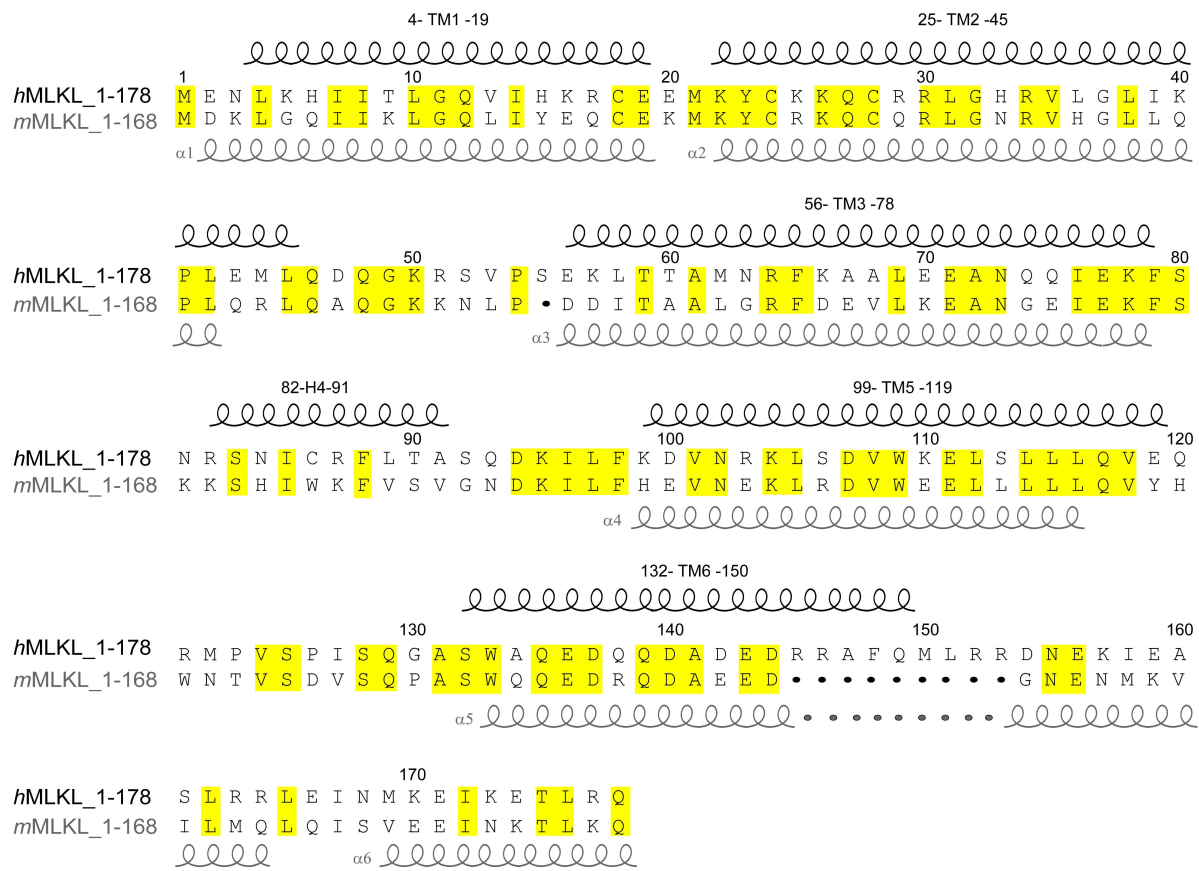

**Figure S3. Homologous analysis of hMLKL (1-178) and mMLKL (1-168) amino acid sequences.**

The helices were labeled based on the solution structures of full-length mouse MLKL (PDB accession code 4BTF) and human MLKL2-178 (PDB accession code 2MSV). 'TM' indicates 'transmembrane'.

Residues that are conserved across all sequences are highlighted in yellow.
