# Supplementary material for: MLKL forms cation channels
Source: PubMed Central journal article supplement — Cell Res. 2016 Apr 1;26(5):517–28. doi: 10.1038/cr.2016.26 (PMC4856759; doi:10.1038/cr.2016.26), 2016-04-01
Supplement: cr201626x4.pdf [file cr201626x4.pdf]

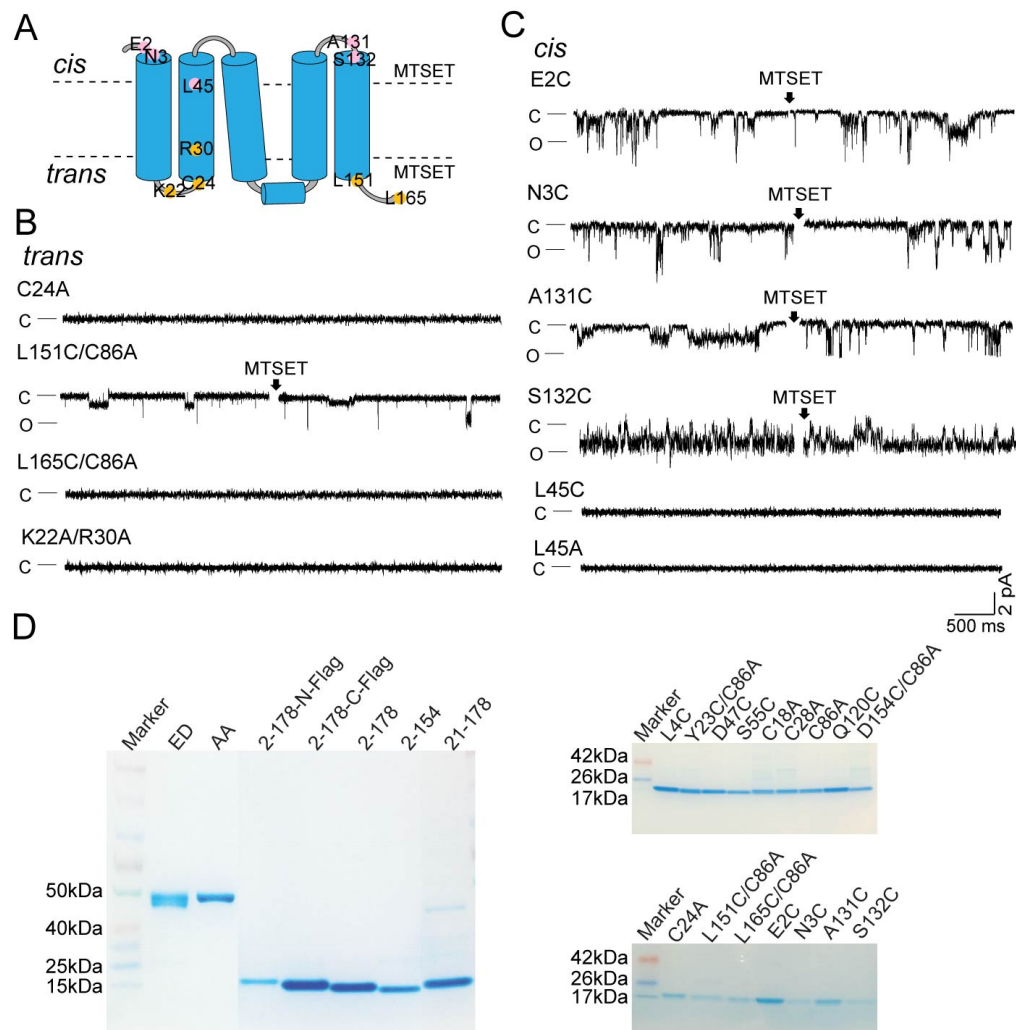

**Figure S4. The mutants in MLKL<sup>2-178</sup> lack sensitivity to MTSET.**(A) Schematic representation of the residues examined and the corresponding six  $\alpha$ -helices revealed by solution MLKL structure. The dotted lines indicate the hypothetical lipid bilayer. MTSET was applied from either *cis* or *trans* side. Mutations for MTSET test from *cis* (small lilac balls) or *trans* (small yellow balls) side are indicated. (B and C) Responses of indicated mutants to MTSET. The mutants C24A, L165C/C86A, K22A/R30A, L45C and L45A cannot induce currents; the mutants E2C, N3C, A131C, S132C and L151C/C86A lack sensitivity to MTSET. The currents were recorded in asymmetric 15:150 mM (*cis:trans*) Na<sup>+</sup> solutions (n > 4 for each

group). (D) The proteint samples were analyzed by SDS PAGE and coomassie blue staining. The positions of molecular weight markers (kDa) are indicated on the left.
