# Supplementary material for: MLKL forms cation channels
Source: PubMed Central journal article supplement — Cell Res. 2016 Apr 1;26(5):517–28. doi: 10.1038/cr.2016.26 (PMC4856759; doi:10.1038/cr.2016.26), 2016-04-01
Supplement: cr201626x6.pdf [file cr201626x6.pdf]

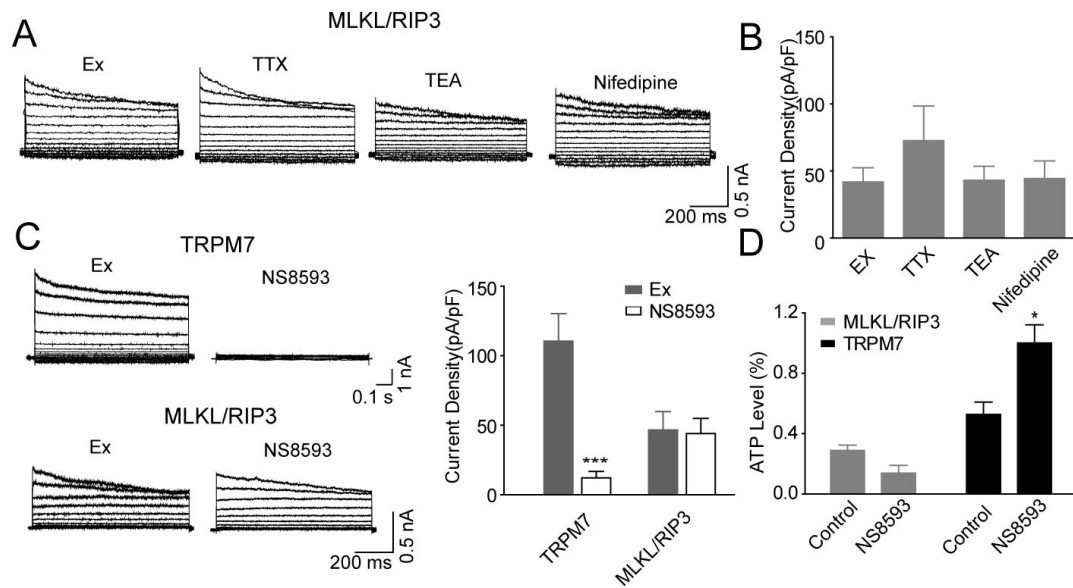

**Figure S6. The effects of the inhibitors of sodium, potassium, calcium and TRPM7 channels on MLKL currents in HEK 293 cells.** (A) Representative traces of MLKL channels in the normal extracellular solution (EX), 1  $\mu$ M Tetrodotoxin (TTX), 40 mM Tetraethylammonium (TEA) and 60  $\mu$ M Nifedipine. (B) Histograms showing current density of MLKL channels under the indicated conditions. (C) Representative currents and current density of TRPM7 and MLKL with and without 10  $\mu$ M NS8593. Being a specific TRPM7 inhibitor, 10  $\mu$ M NS8593 completely inhibits the currents mediated by TRPM7 but does not affect the currents recorded in HEK293 cells coexpressing MLKL/RIP3. For the whole-cell recordings, the external solution contained (in mM): NaCl 140, KCl 5, CaCl<sub>2</sub> 2, HEPES 20, glucose 10 (adjusted to pH 7.4 with NaOH); the internal solution contained (in mM): CsCl 145, NaCl 8, EGTA 10, HEPES 10 (adjusted to pH 7.2 with CsOH). (D) NS8593 (10 $\mu$ M) reduces the cell death of HEK 293 cells induced by TRPM7 but lacks protection activity on the cell death induced by MLKL/RIP3.
