# Supplementary material for: MLKL forms cation channels
Source: PubMed Central journal article supplement — Cell Res. 2016 Apr 1;26(5):517–28. doi: 10.1038/cr.2016.26 (PMC4856759; doi:10.1038/cr.2016.26), 2016-04-01
Supplement: cr201626x7.pdf [file cr201626x7.pdf]

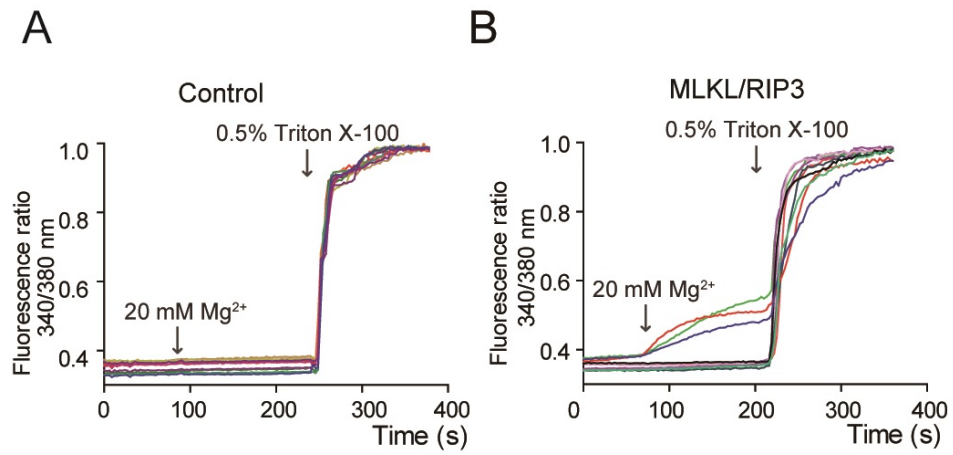

**Figure S7. Original recording of Mg<sup>2+</sup> influx in HEK293 cells transfected with blank vector (A) or MLKL/RIP3 (B) using an fluorescence indicator mag-fluo-4.** Detergent (0.5% Triton X-100) was applied at the end of the recording. Approximately 10-40% recorded HEK293 cells exhibited response to extracellular 20 mM Mg<sup>2+</sup>.
