# Supplementary material for: MLKL forms cation channels
Source: PubMed Central journal article supplement — Cell Res. 2016 Apr 1;26(5):517–28. doi: 10.1038/cr.2016.26 (PMC4856759; doi:10.1038/cr.2016.26), 2016-04-01
Supplement: cr201626x8.pdf [file cr201626x8.pdf]

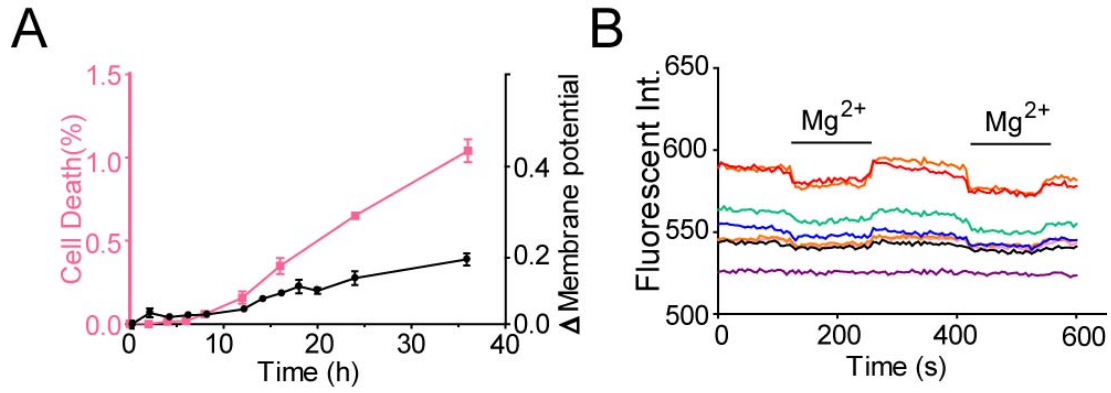

**Figure S8. Effects of extracellular  $Mg^{2+}$  on the membrane potential.** (A) Expression of MLKL/RIP3 induced time-dependent cell death (pink line) and depolarization of membrane potential (black line). (B)  $Mg^{2+}$  (10 mM) hyperpolarizes the membrane potential of HEK293 cells transfected with MLKL/RIP3. The downward deflection indicates the hyperpolarization of the membrane potential.
